# Supplementary material for: Melatonin in functionalized biomimetic constructs promotes rapid tissue regeneration in Wistar albino rats
Source: Royal Society of Chemistry journal article supplement (doi:10.1039/c6tb01221c), 2016-01-01

## Supporting Information

**Melatonin in functionalized biomimetic constructs promotes rapid tissue regeneration in Wistar albino rats**

**Ragothaman Murali, Palanisamy Thanikaivelan\*, Kalirajan Cheirmadurai**

*Advanced Materials Laboratory, Central Leather Research Institute (Council of Scientific and Industrial Research), Adyar, Chennai 600020, India*

*\*E-mail: thanik8@yahoo.com; thanik@clri.res.in*

**Fig. S1.** SEM images showing the surface morphology of 100/100 wt.% C/PDAGA hybrid scaffold with pore size.

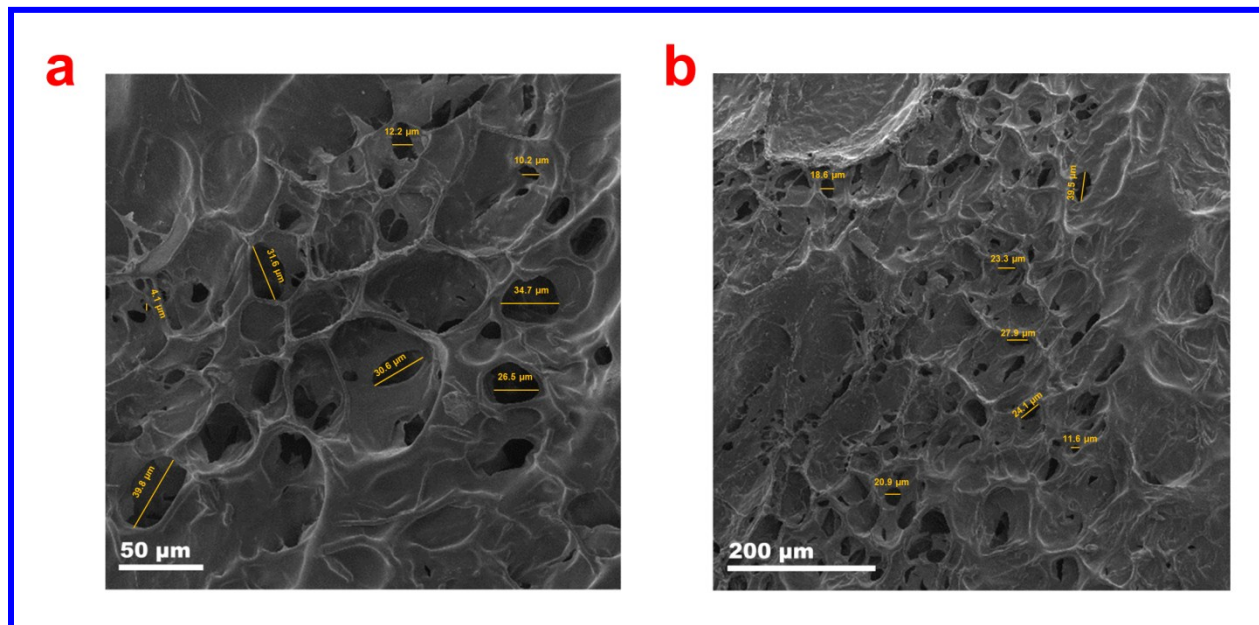

**Fig. S2.** Digital images of as-prepared freeze dried hybrid scaffolds showing the surface and cross section morphology.

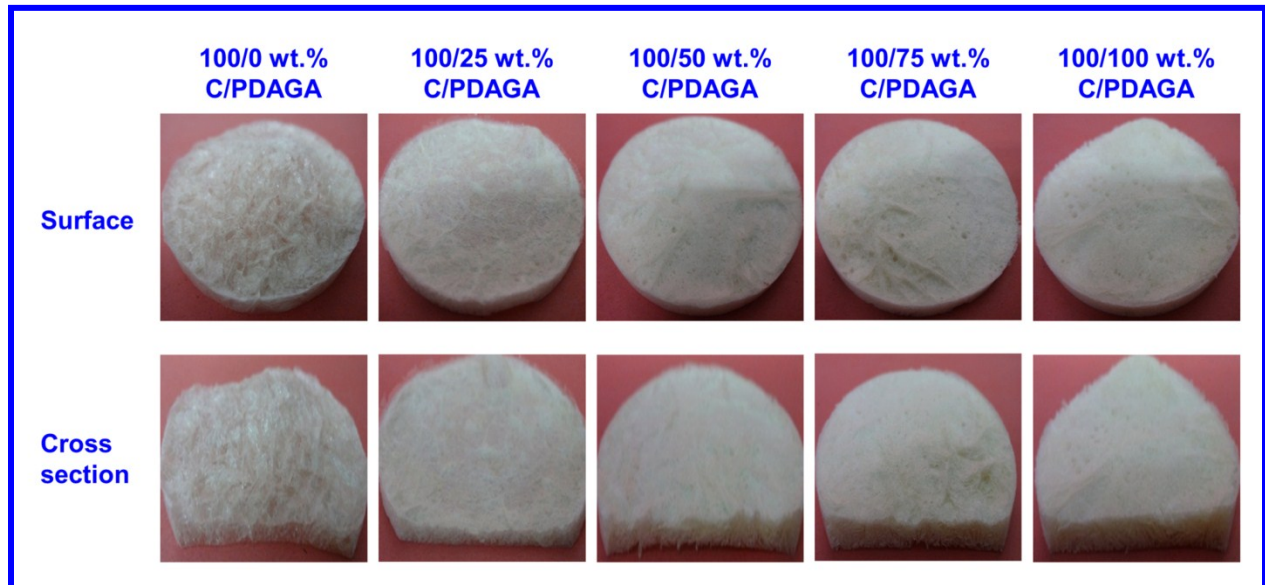

**Fig. S3.** BET observation of 100/0 wt.% C/PDAGA hybrid scaffold (a) Nitrogen adsorption-desorption isotherm and (b) Pore size distribution curve.

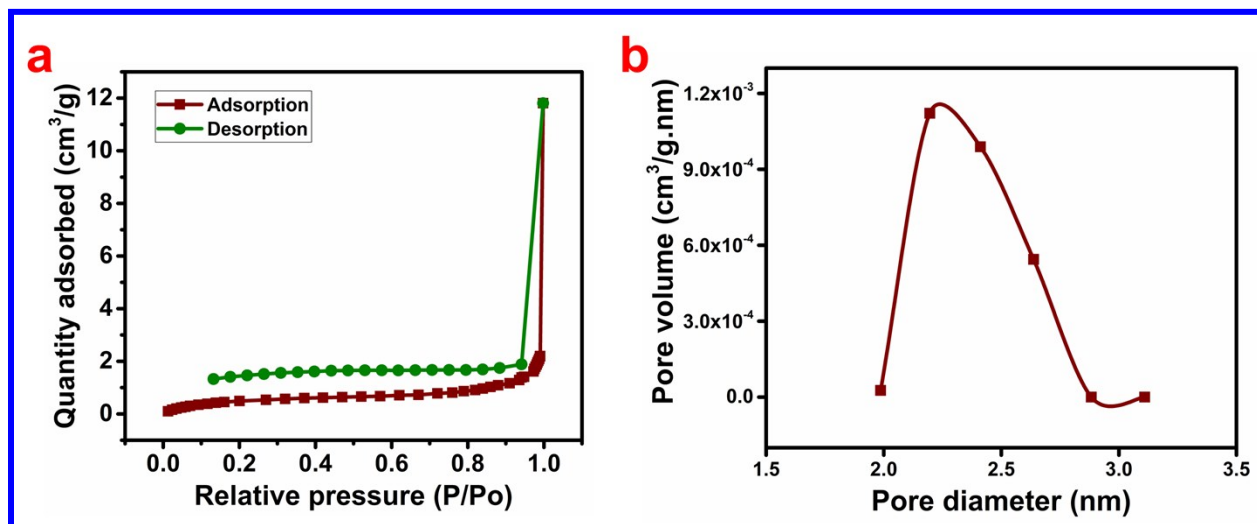

**Fig. S4.** Individual fluorescence microscopic images of fluorescein diacetate stained Swiss 3T6 mouse fibroblast cells on the 100/0, 100/100 wt.% C/PDAGA and 100/100 wt.% C/PDAGA loaded with melatonin hybrid scaffolds at 24 h culture period.

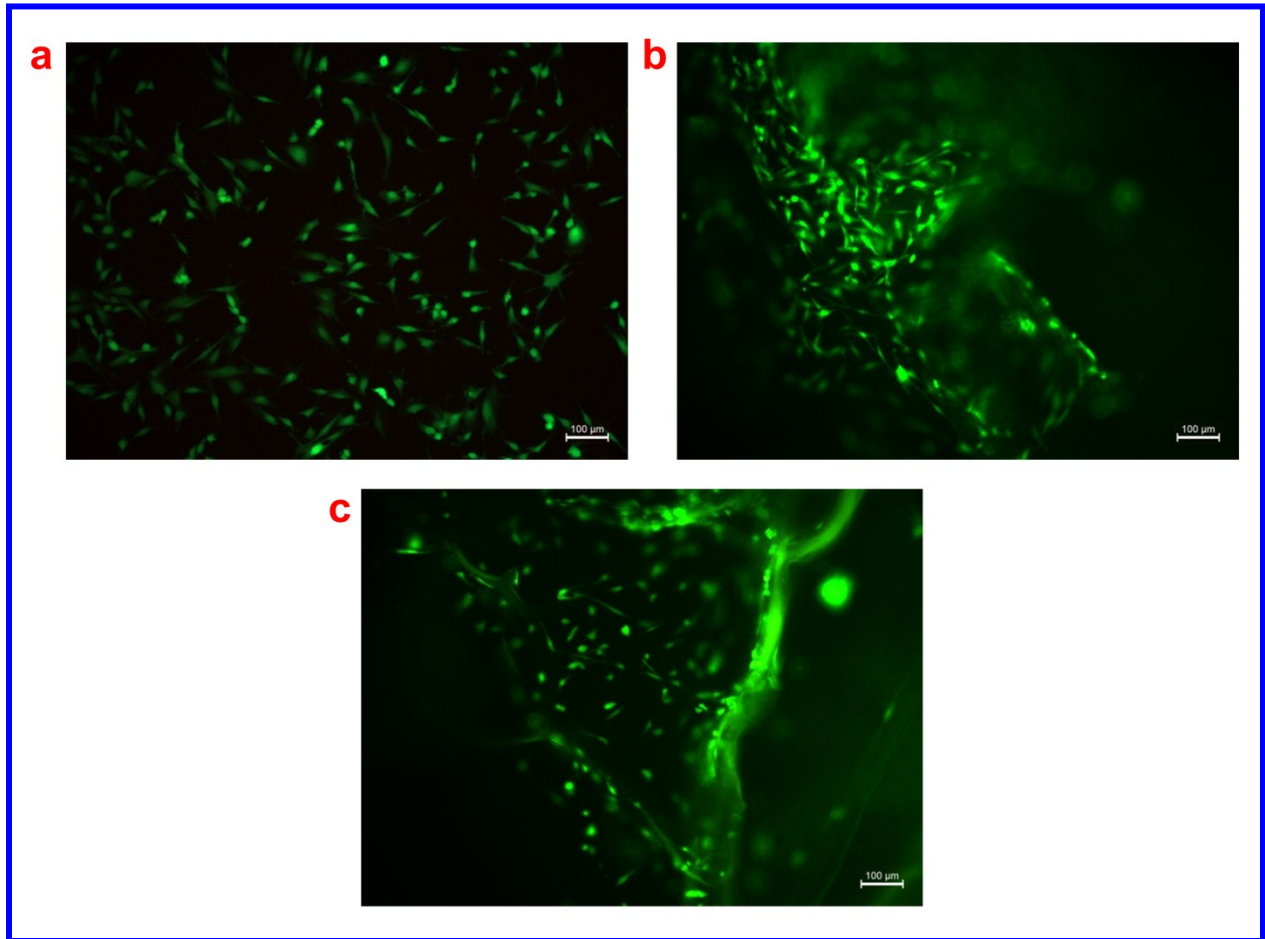

**Fig. S5.** Individual fluorescence microscopic images of fluorescein diacetate stained Swiss 3T6 mouse fibroblast cells on the 100/0, 100/100 wt.% C/PDAGA and 100/100 wt.% C/PDAGA loaded with melatonin hybrid scaffolds at 72 h culture period.

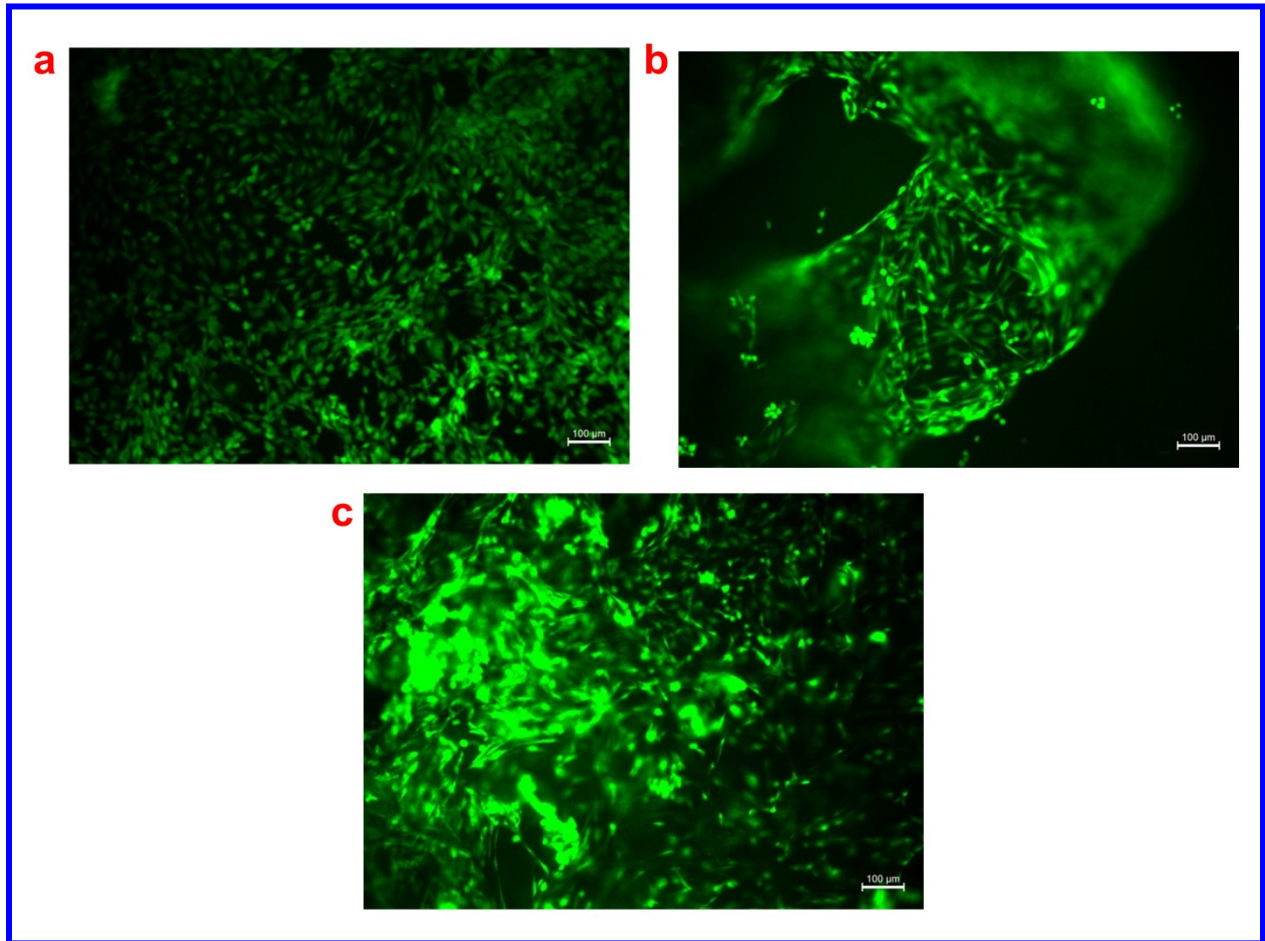



**Fig. S6.** Individual photomicrographs of control group after haematoxylin and eosin staining at (a) 4<sup>th</sup>, (b) 8<sup>th</sup> and (c) 12<sup>th</sup> day of granulation tissue. F and M refer to fibroblasts and macrophages, respectively. Schematic shows the structural morphology of fibroblasts, inflammatory cells and blood vessels.

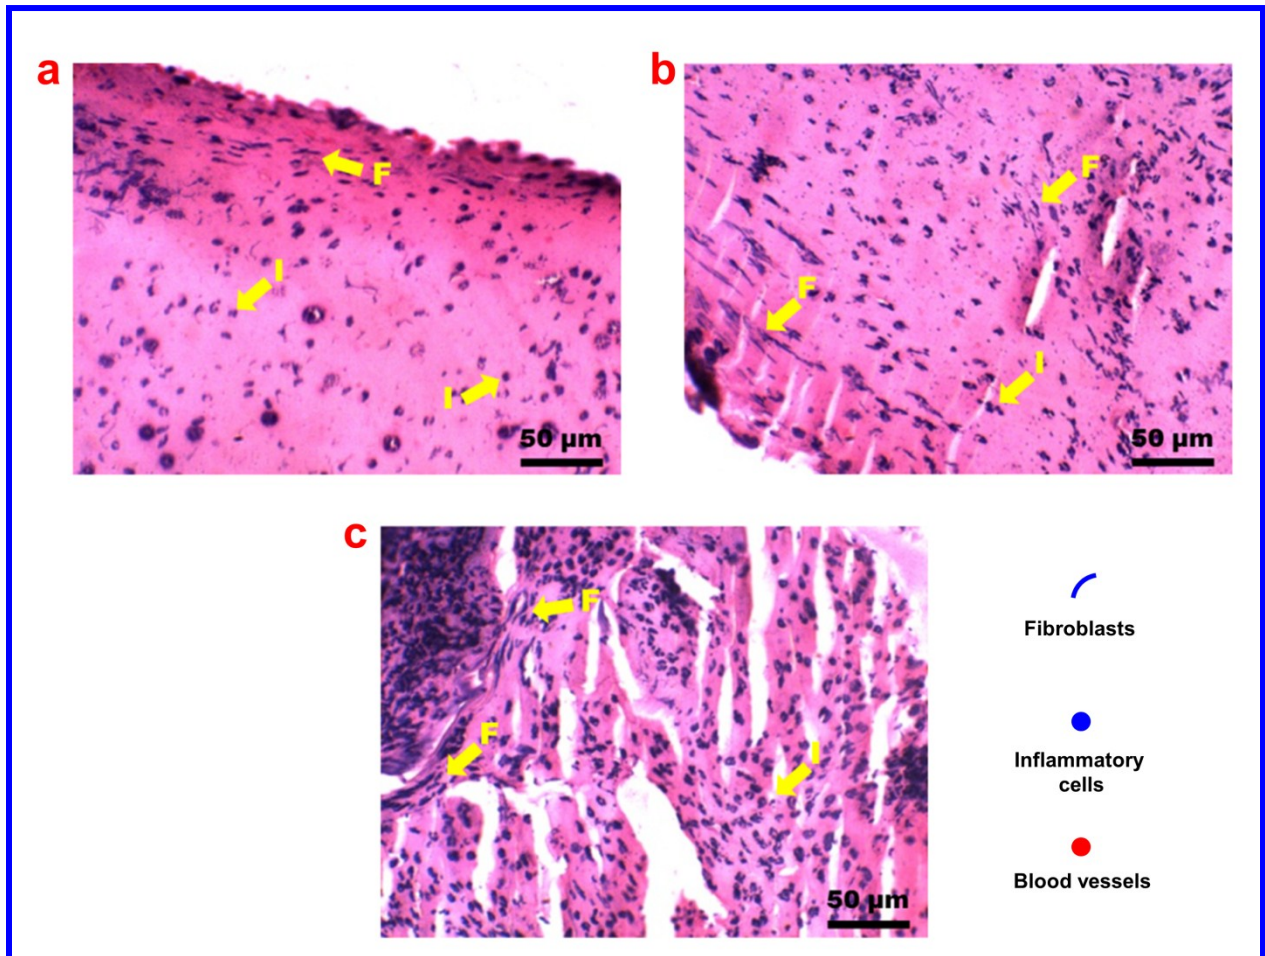

**Fig. S7.** Individual photomicrographs of 100/0 wt.% C/PDAGA hybrid scaffold treated group after haematoxylin and eosin staining at (a) 4<sup>th</sup>, (b) 8<sup>th</sup> and (c) 12<sup>th</sup> day of granulation tissue. F and M refer to fibroblasts and macrophages, respectively. Schematic shows the structural morphology of fibroblasts, inflammatory cells and blood vessels.

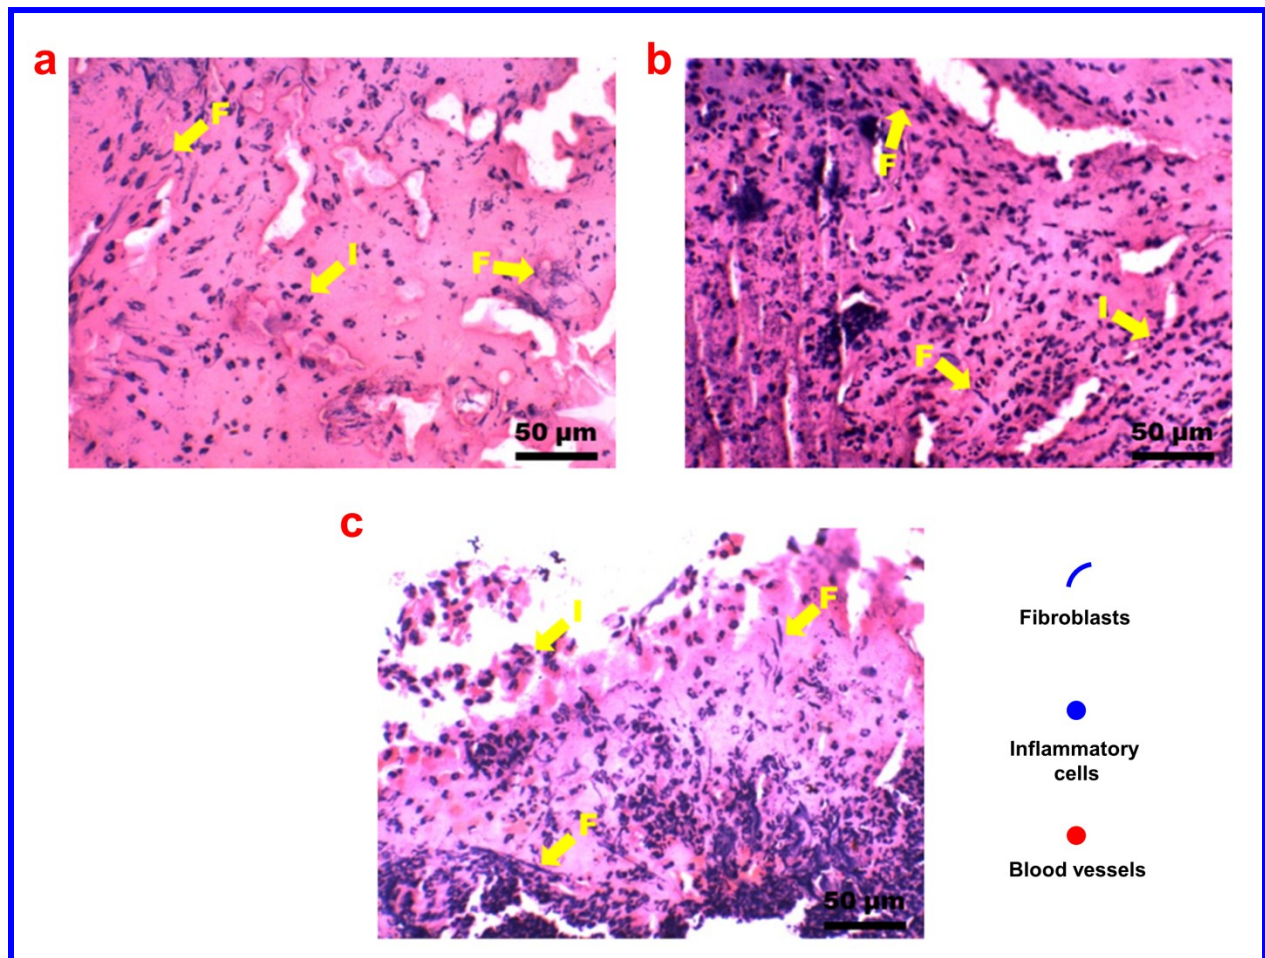



**Fig. S8.** Individual photomicrographs of 100/100 wt.% C/PDAGA hybrid scaffold treated group after haematoxylin and eosin staining at (a) 4<sup>th</sup>, (b) 8<sup>th</sup> and (c) 12<sup>th</sup> day of granulation tissue. F and M refer to fibroblasts and macrophages, respectively. Schematic shows the structural morphology of fibroblasts, inflammatory cells and blood vessels.

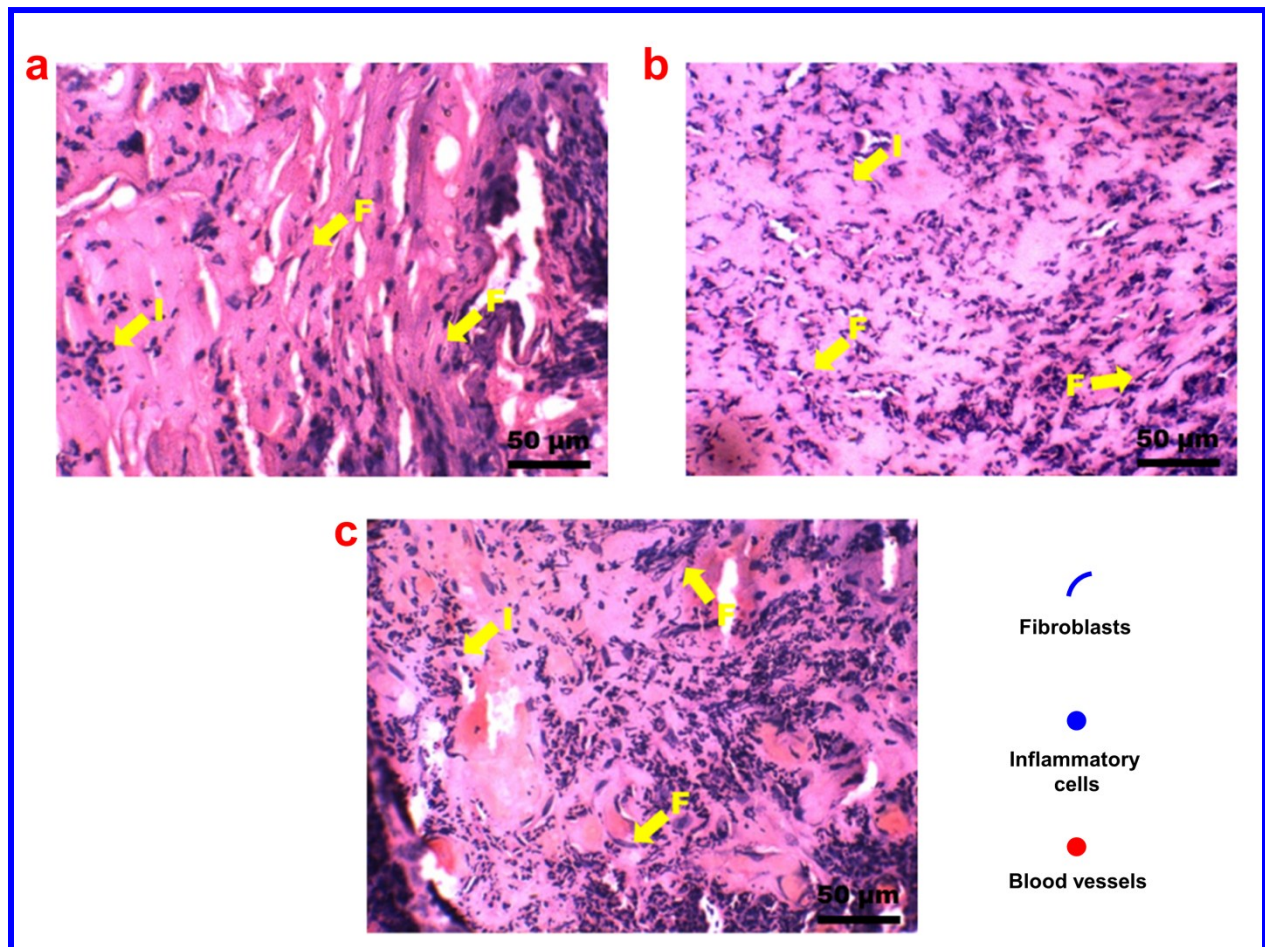

**Fig. S9.** Individual photomicrographs of 100/100 wt.% C/PDAGA loaded with melatonin hybrid scaffold treated group after haematoxylin and eosin staining at (a) 4<sup>th</sup>, (b) 8<sup>th</sup> and (c) 12<sup>th</sup> day of granulation tissue. F, M and BV refer to fibroblasts, macrophages and blood vessels, respectively. Schematic shows the structural morphology of fibroblasts, inflammatory cells and blood vessels.

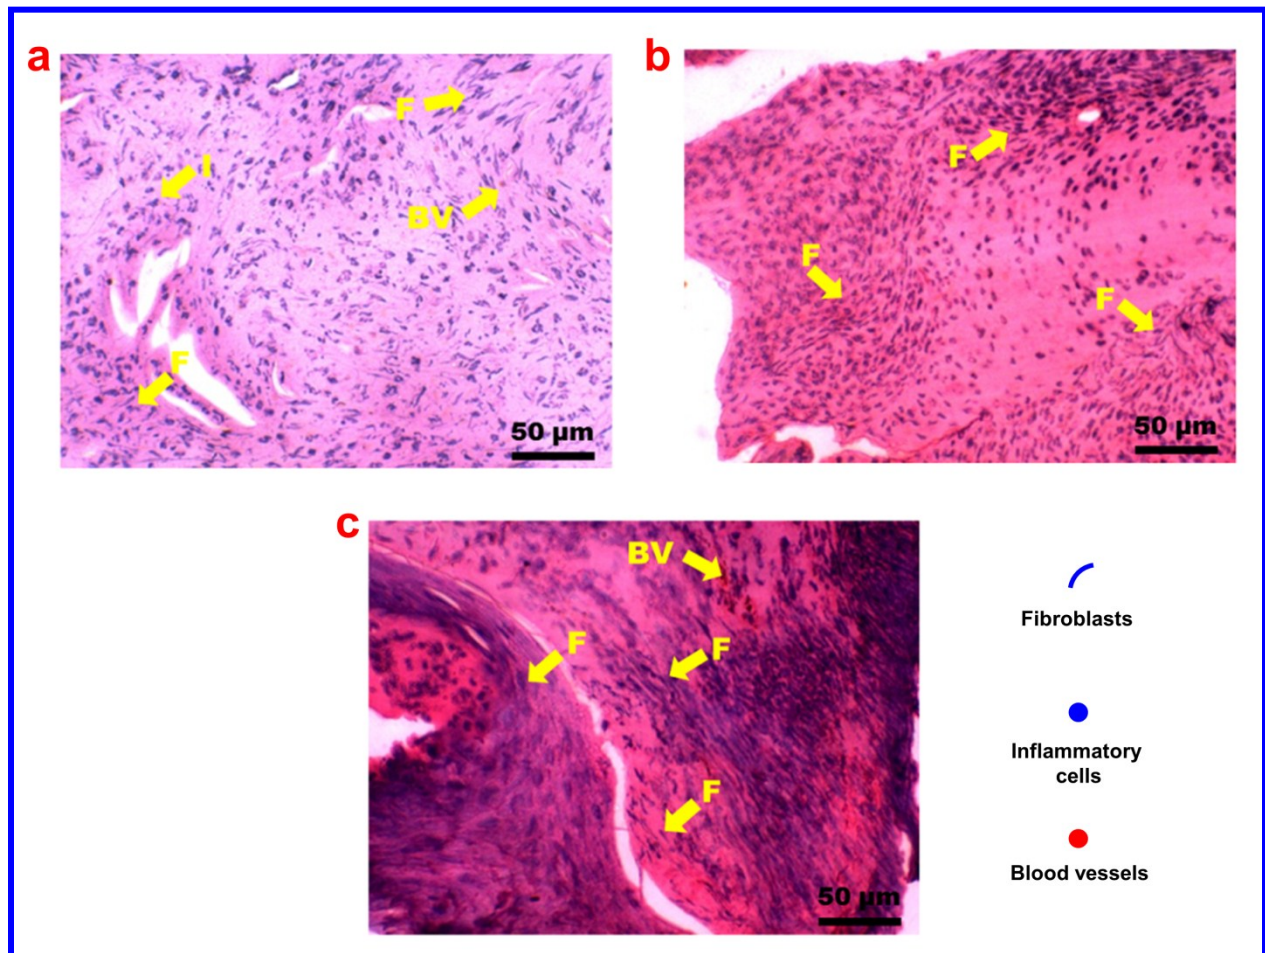

**Fig. S10.** Individual photomicrographs of control group after Masson's trichrome staining at (a) 4<sup>th</sup>, (b) 8<sup>th</sup> and (c) 12<sup>th</sup> day of granulation tissue. Blue colour stained region in the images indicates the collagen formation.

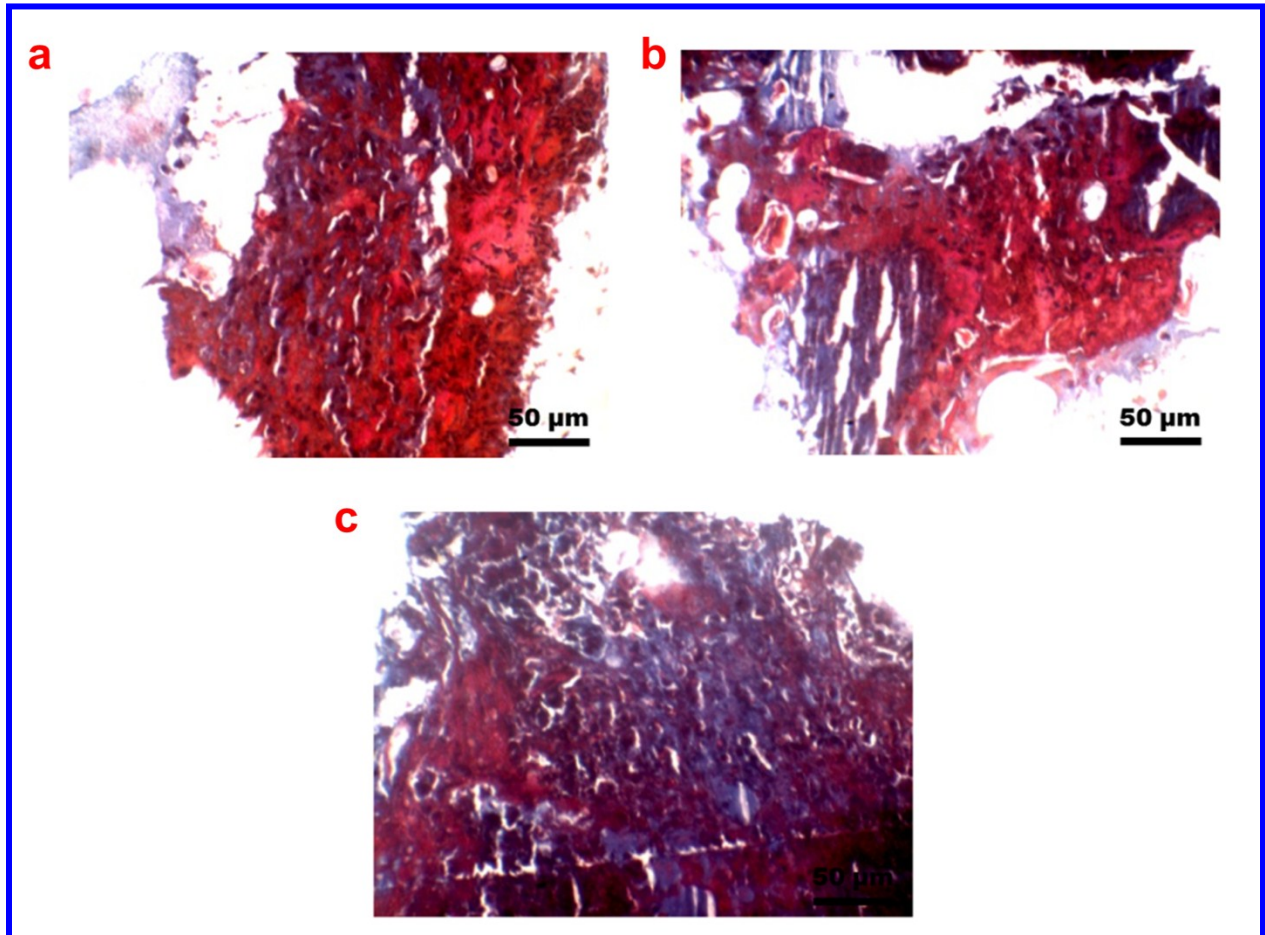



**Fig. S11.** Individual photomicrographs of 100/0 wt.% C/PDAGA hybrid scaffold treated group after Masson's trichrome staining at (a) 4<sup>th</sup>, (b) 8<sup>th</sup> and (c) 12<sup>th</sup> day of granulation tissue. Blue colour stained region in the images indicates the collagen formation.

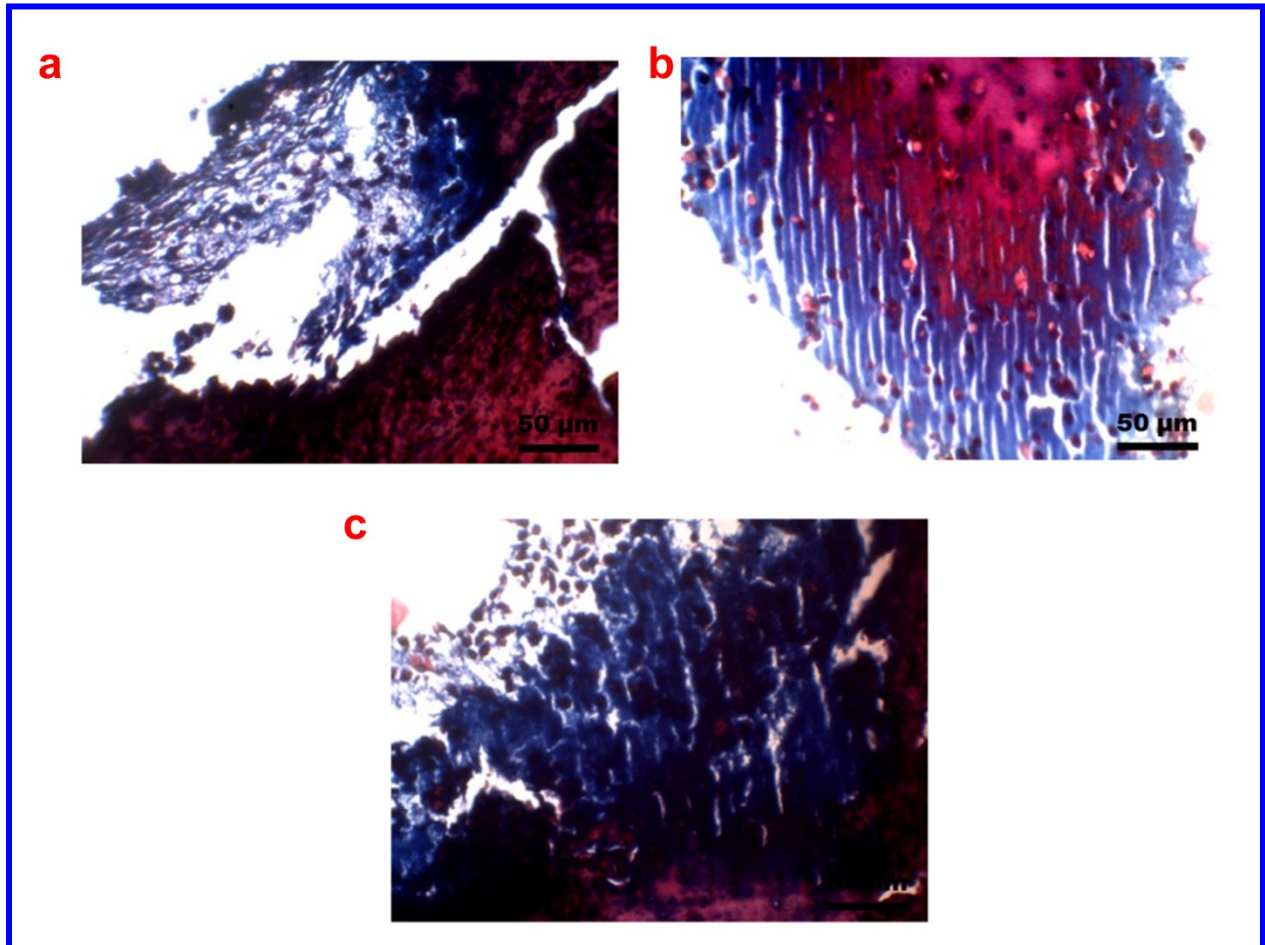

**Fig. S12.** Individual photomicrographs of 100/100 wt.% C/PDAGA hybrid scaffold treated group after Masson's trichrome staining at (a) 4<sup>th</sup>, (b) 8<sup>th</sup> and (c) 12<sup>th</sup> day of granulation tissue. Blue colour stained region in the images indicates the collagen formation.

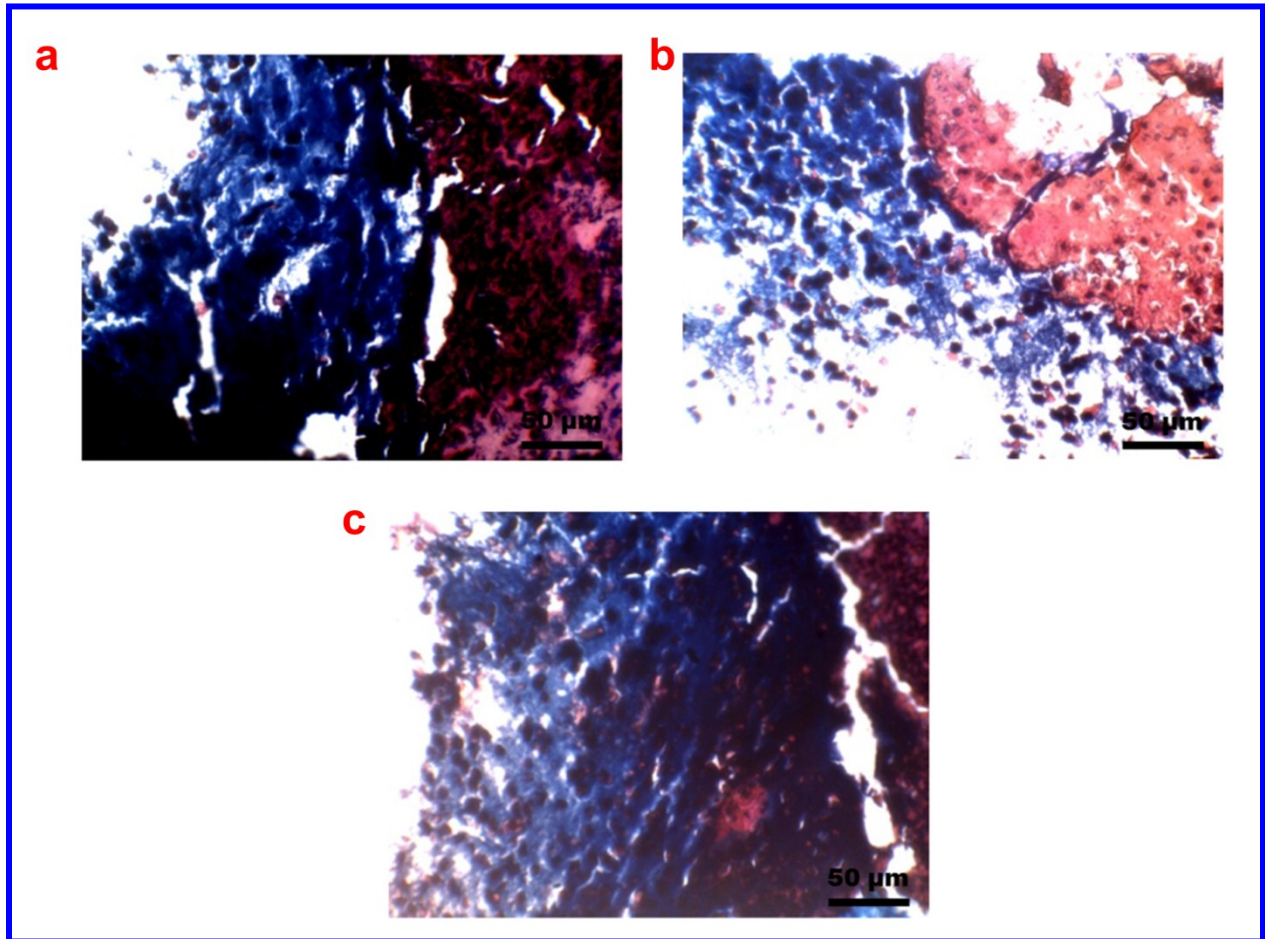



**Fig. S13.** Individual photomicrographs of 100/100 wt.% C/PDAGA loaded with melatonin hybrid scaffold treated group after Masson's trichrome staining at (a) 4<sup>th</sup>, (b) 8<sup>th</sup> and (c) 12<sup>th</sup> day of granulation tissue. Blue colour stained region in the images indicates the collagen formation.

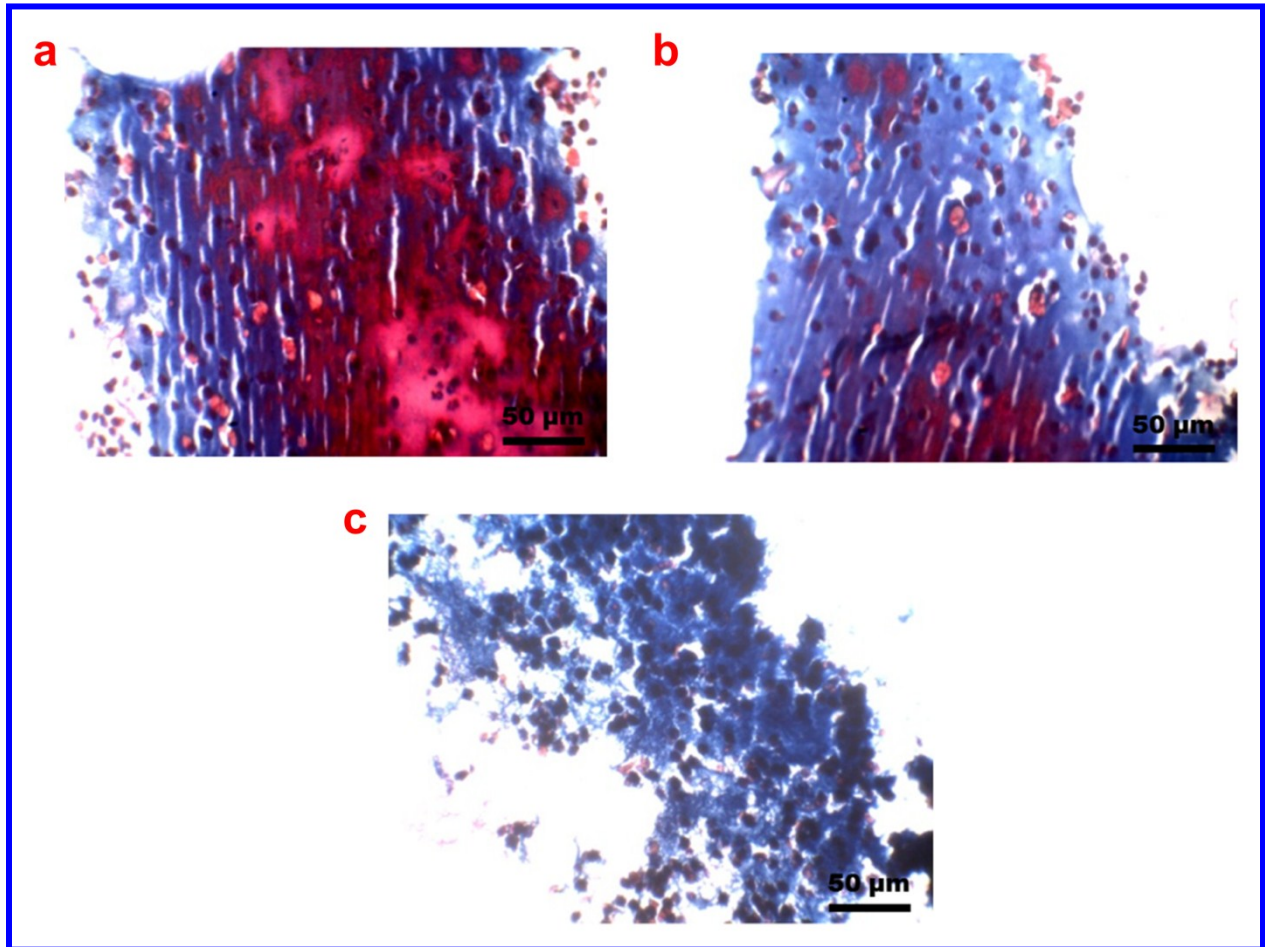

Supplement: c6tb01221c1.pdf [file c6tb01221c1.pdf]
